# Supplementary material
Source: publisher figshare collection journal article supplement (https://frontiersin.figshare.com/ndownloader/files/14063213)
Supplement: Supplementary file 1 [file 14063213]

## Appendix

### A1: Generation capacities for Europe as obtained from the ELIN model

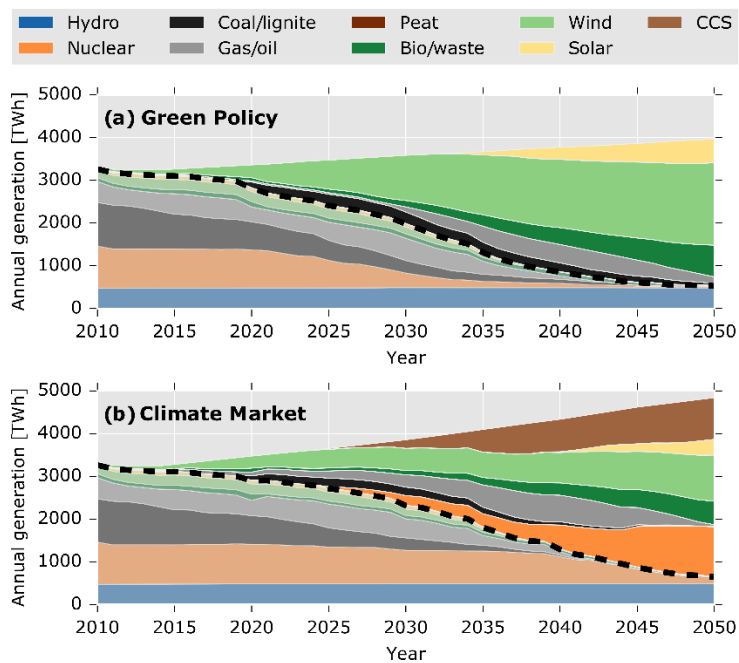

**Fig. A 1: Electricity generation capacities for the Green Policy and Climate Market scenarios, according to output from the ELIN investment model (adapted from Goop (2017))**

## A2: Technology input data to the ELIN and EPOD models

**Table A 1: Lifetime, investment costs and fixed and variable O&M costs for the different technologies as utilized in the modelling.**

| Technology             | Lifetime<br>[years] | Inv. cost<br>[€/kW] |      | Fixed<br>O&M<br>[€/kW,yr] | Variable<br>O&M<br>[€/kW,yr] |
|------------------------|---------------------|---------------------|------|---------------------------|------------------------------|
|                        |                     | 2030                | 2050 |                           |                              |
| <b>Hard coal</b>       |                     |                     |      |                           |                              |
| Condense               | 40                  | 1550                | 1550 | 27.4                      |                              |
| CHP/BP                 | 40                  | 1550                | 1550 | 27.4                      |                              |
| CCS                    | 40                  | 2390                | 1970 | 47.9                      | 1.55                         |
| CCS cofire             | 40                  | 2790                | 2370 | 57.5                      | 1.86                         |
| <b>Lignite</b>         |                     |                     |      |                           |                              |
| Condense               | 40                  | 1250                | 1250 | 31.7                      |                              |
| CHP/BP                 | 40                  | 1250                | 1250 | 31.7                      |                              |
| CCS                    | 40                  | 2190                | 1770 | 44.9                      | 1.36                         |
| CCS cofire             | 40                  | 2590                | 2170 | 53.9                      | 1.63                         |
| <b>Natural Gas</b>     |                     |                     |      |                           |                              |
| GT                     | 30                  | 380                 | 380  | 8                         |                              |
| CCGT                   | 30                  | 750                 | 750  | 13                        |                              |
| CHP/BP                 | 30                  | 780                 | 780  | 16.6                      |                              |
| CCS                    | 30                  | 1170                | 1020 | 41.2                      | 2.8                          |
| <b>Nuclear</b>         |                     |                     |      |                           |                              |
|                        | 45                  | 4200                | 4200 | 57.6                      |                              |
| <b>Bio &amp; Waste</b> |                     |                     |      |                           |                              |
| Condense               | 40                  | 2500                | 2500 | 50                        |                              |
| Waste                  | 40                  | 9060                | 9060 | 443                       |                              |
| CHP/BP                 | 40                  | 2900                | 2900 | 57.6                      |                              |
| <b>Intermittent</b>    |                     |                     |      |                           |                              |
| Wind<br>(onshore)      | 25                  | 1320                | 1190 | 27.4                      |                              |
| Wind<br>(offshore)     | 25                  | 2190                | 1880 | 72.7                      |                              |
| Solar PV               | 25                  | 1280                | 660  | 27.4                      |                              |

Assumptions from the World Energy Outlook by the IEA, 2011-2014, extrapolated after the year 2035. Costs for CCS are taken from the Zero Emission Platform (ZEP)
